# Supplementary material for: Mitochondrial RNA Helicases: Key Players in the Regulation of Plant Organellar RNA Splicing and Gene Expression
Source: MDPI journal article supplement (doi:10.3390/ijms25105502), 2024-05-17
Supplement: s1 [file s1]

**Supplementary Table S1.** RNA helicases encoded in *Arabidopsis thaliana* genome.

| Gene I.D. *1           | Protein I.D. / Gene function                                                  | Predicted loci*2 |
|------------------------|-------------------------------------------------------------------------------|------------------|
| Putative RNA helicases |                                                                               |                  |
| At1g05460              | RNA helicases SDE3, Post-transcriptional gene silencing                       | Nuc              |
| At1g06670              | Nucleuslear DEIH-box helicase (NIH)                                           | Nuc              |
| At1g08600              | ATRX/CHR20                                                                    | Nuc              |
| At1g11100              | SNF2 domain-containing protein                                                | Nuc              |
| At1g12770              | RH47, Regulating cell-to-cell transport via plasmodesmata                     | Mit              |
| At1g16280              | DEA(D/H)-box RNA helicase, RH36                                               | Nuc              |
| At1g16970              | KU70 homolog, Maintenance of the telomeric C strand                           | Nuc              |
| At1g20920              | DEAD box RNA helicase (RH42)                                                  | Nuc              |
| At1g20960              | EMB1507, U5 small Nucleuslear riboNucleusleoprotein helicase, putative        | Nuc              |
| At1g31970              | Stress response suppressor 1 (STRS1, RH5)                                     | Nuc              |
| At1g32490              | Encodes a homolog of the yeast PRP2 protein, RNA splicing                     | Nuc              |
| At1g35530              | DEA(D/H)-box RNA helicase family protein                                      | Nuc              |
| At1g48650              | DEA(D/H)-box RNA helicase family protein                                      | Mit              |
| At1g48920              | Nucleusleolin like 1 (AtNUCLEUS-L1), rRNA processing, ribosome biosynthesis   | Nuc              |
| At1g51380              | Putative translation initiation factor 4A (RH2)                               | Cyt              |
| At1g55150              | DEA(D/H)-box RNA helicase, putative (RH20)                                    | Nuc              |
| At1g59760              | RNA helicase, ATP-dependent, SK12/DOB1 protein                                | Nuc              |
| At1g59990              | DEA(D/H)-box RNA helicase, putative (RH22)                                    | Clp              |
| At1g61140              | SNF2 domain-containing protein, EDA16 (EMB-16)                                | Nuc              |
| At1g63250              | DEA(D/H)-box RNA helicase family protein (RH48), putative splicing factor     | Mit              |
| At1g71280              | DEA(D/H)-box RNA helicase family protein (RH55)                               | Nuc              |
| At1g72730              | DEA(D/H)-box RNA helicase protein, Eukaryote translation initiation factor 4A | Nuc              |
| At1g77050              | DEA(D/H)-box RNA helicase family protein (RH29)                               | Mit              |
| At1g79890              | RAD3-like DNA-binding helicase protein                                        | Nuc              |
| At1g79950              | RAD3-like DNA-binding helicase protein                                        | Nuc              |
| At2g01130              | DEA(D/H)-box RNA helicase family protein                                      | Nuc              |
| At2g01440              | DEA(D/H)-box RNA helicase family protein                                      | Mit              |
| At2g06990              | SK12/DOB1 protein, a putative DEXH-box RNA helicase                           | Nuc              |
| At2g07750              | DEA(D/H)-box RNA helicase family protein (RH33), group II intron splicing*3   | Mit              |
| At2g33730              | P-loop containing NTP hydrolases superfamily protein (RH21)                   | Nuc              |
| At2g35920              | RNA helicase family protein                                                   | Nuc              |
| At2g40700              | RNA helicase family protein (RH17)                                            | Nuc              |
| At2g42270              | U5 small nuclear ribonucleoprotein helicase                                   | Nuc              |
| At2g42520              | P-loop containing NTP hydrolases superfamily protein (RH37)                   | Nuc              |
| At2g45810              | DEA(D/H)-box RNA helicase family protein (RH6)                                | Cyt              |
| At2g47250              | RNA helicase family protein                                                   | Nuc              |
| At2g47330              | P-loop containing NTP hydrolases superfamily protein (RH24)                   | Nuc              |
| At3g01540              | DEAD-box RNA helicase, DRH1                                                   | Nuc              |
| At3g02060              | DEA(D/H)-box RNA helicase family protein                                      | Clp              |
| At3g06480              | DEAD box RNA helicase family protein (RH40)                                   | Nuc              |
| At3g06980              | DEA(D/H)-box RNA helicase family protein (RH50)                               | Clp              |
| At3g09620              | P-loop containing NTP hydrolases superfamily protein (RH45)                   | Nuc              |

|                        |                                                                                  |         |
|------------------------|----------------------------------------------------------------------------------|---------|
| At3g09720              | P-loop containing NTP hydrolases superfamily protein (RH57)                      | Nuc     |
| At3g13920              | Eukaryotic translation initiation factor 4A1; (RH4)                              | Cyt     |
| At3g16600              | SNF2 domain-containing protein                                                   | Nuc     |
| At3g16840              | P-loop containing NTP hydrolases superfamily protein (RH13)                      | Nuc     |
| At3g18600              | P-loop containing NTP hydrolases superfamily protein (RH51)                      | Nuc     |
| At3g22310              | Putative mitochondrial RNA helicase 1 (PMH1, RH9)                                | Mit     |
| At3g46960              | RNA helicase SK12/DOB1 protein, HUA enhancer 2 (HEN2)                            | Nuc     |
| At3g53110              | P-loop containing NTP hydrolases superfamily protein (LOS4)                      | Nuc/Cyt |
| At3g58510              | DEA(D/H)-box RNA helicase family protein; (RH11)                                 | Nuc     |
| At3g61240              | DEA(D/H)-box RNA helicase family protein (RH12)                                  | Nuc     |
| At3g62310              | RNA helicase family protein;                                                     | Nuc     |
| At4g00660              | RNAhelicase-like 8; (RH8)                                                        | Nuc     |
| At4g01020              | helicase domain-containing protein / IBR domain-containing protein               | Nuc     |
| At4g09730              | Introduction of the hidden break into the 23S rRNA in the chloroplasts (RH39)    | Clp     |
| At4g15850              | RNA helicase 1; plant DEAD box-like RNA helicase.                                | Nuc     |
| At4g16630              | DEA(D/H)-box RNA helicase family protein (RH28)                                  | Nuc     |
| At4g16680              | P-loop containing NTP hydrolases superfamily protein, similar to MEE29           | Nuc     |
| At4g18465              | RNA helicase family protein (EMB-2733)                                           | Nuc     |
| At4g25120              | Encodes a homolog of the yeast SRS2 helicase                                     | Nuc     |
| At4g33370              | DEA(D/H)-box RNA helicase family protein; (RH43)                                 | Nuc     |
| At4g34910              | P-loop containing NTP hydrolases superfamily protein (RH16)                      | Nuc     |
| At4g35740              | DEA(D/H)-box RNA helicase RECQL3                                                 | Nuc     |
| At5g05130              | DNA/RNA helicase protein (SNF2 domain-containing protein)                        | Nuc     |
| At5g05450              | P-loop containing NTP hydrolases superfamily protein (RH18)                      | Nuc     |
| At5g07810              | SNF2 domain-containing protein / HNH endonuclease domain-containing protein      | Nuc     |
| At5g08610              | P-loop containing NTP hydrolases superfamily protein (RH26)                      | Clp     |
| At5g08620              | Stress response suppressor 2 (STRS2, RH25)                                       | Nuc     |
| At5g10370              | Helicase domain-containing protein / IBR domain-containing protein               | Nuc     |
| At5g11170              | DEA(D/H)-box RNA helicase family protein (RH15)                                  | Nuc     |
| At5g11200              | DEA(D/H)-box RNA helicase family protein (RH56)                                  | Nuc     |
| At5g14610              | DEAD box RNA helicase family protein (RH46)                                      | Nuc     |
| At5g19210              | P-loop containing NTP hydrolases superfamily protein (RH58)                      | POs     |
| At5g41360              | Homolog of Xeroderma pigmentosum complementation group B 2 (XPB2)                | Nuc     |
| At5g41370              | Homolog of Xeroderma pigmentosum complementation group B 2 (XPB1)                | Nuc     |
| At5g51280              | DEAD-box protein abstrakt, putative; (RH35)                                      | Nuc     |
| At5g54910              | DEA(D/H)-box RNA helicase family protein; (RH32)                                 | Nuc     |
| At5g60990              | DEA(D/H)-box RNA helicase family protein; (RH10)                                 | Nuc     |
| At5g62190              | DEA(D/H)-box RNA helicase family protein; (PRH75)                                | Nuc     |
| At5g63120              | P-loop containing NTP hydrolases superfamily protein; ethylene-responsive (RH30) | Nuc     |
| At5g63630              | P-loop containing NTP hydrolases superfamily protein; (RH31)                     | Nuc     |
| At5g65900              | DEA(D/H)-box RNA helicase family protein; (RH27)                                 | Nuc     |
| Putative DNA helicases |                                                                                  |         |
| At1g08840              | EMB2411, putative DNA replication helicase                                       | Nuc     |
| At1g20750              | RAD3-like DNA-binding helicase protein                                           | Nuc     |
| At1g48310              | Chromatin remodeling factor18 (CRF18)                                            | Nuc     |
| At1g60930              | RECQ helicase L4B (AtRECQ4B ), Involved in homologous recombination              | Mit     |
| At2g07690              | Minichromosome maintenance (MCM) family protein, DNA replication initiation      | Nuc     |

|           |                                                                                    |     |
|-----------|------------------------------------------------------------------------------------|-----|
| At2g14050 | Minichromosome maintenance 9; MCM9                                                 | Nuc |
| At2g16440 | Minichromosome maintenance (MCM) family protein, DNA replication initiation        | Nuc |
| At2g20980 | Minichromosome maintenance 10, MCM10                                               | Nuc |
| At3g05740 | RECQ helicase I1 (RECQI1), DNA recombination                                       | Nuc |
| At3g09660 | Minichromosome maintenance 8 (MCM8)                                                | Nuc |
| At4g02060 | Minichromosome maintenance family protein MCM7                                     | Nuc |
| At1g48050 | KU80 family protein, Mutants are defective in T-DNA integration                    | Nuc |
| At1g31360 | RECQ helicase L2 (RECQL2), DNA unwinding                                           | Nuc |
| At5g20420 | Chromatin remodeling 42 (CHR42)                                                    | Nuc |
| At5g46280 | Minichromosome maintenance family protein MCM3                                     | Nuc |
| At5g63950 | chromatin remodeling 24                                                            | Nuc |
| At1g03750 | Chromatin remodeling 9; switch 2;                                                  | Nuc |
| At1g10930 | DNA helicase RECQ14A; (AtRECQ4A)                                                   | Nuc |
| At1g05490 | Chromatin remodeling 31                                                            | Nuc |
| At1g27880 | DEA(D/H)-box RNA helicase family protein; Similar to RecQ13 (Recq-like 3)          | Nuc |
| At2g02090 | SNF2 domain-containing protein; Chromatin remodeling 19                            | Nuc |
| At2g03270 | DNA-binding protein, putative;                                                     | Nuc |
| At2g30800 | RNA or DNA helicase (ATVT1); expressed specifically in tapetum and vascular tissue | Nuc |
| At2g13370 | Chromatin remodeling 5                                                             | Nuc |
| At3g27730 | DNA helicase (MER3); required for interference-sensitive meiotic crossover events  | Nuc |
| At3g51690 | DNA helicase homolog PIF1; PIF1 helicase                                           | Nuc |
| At3g54280 | DNA binding; ATP binding; nucleic acid binding helicase                            | Nuc |
| At5g22330 | P-loop containing NTP hydrolases superfamily protein (AtTIP49A)                    | Nuc |
| At5g27680 | RECQ helicase SIM; DNA helicase (RECQSIM)                                          | Nuc |
| At5g67630 | P-loop containing NTP hydrolases superfamily protein                               | Nuc |

\*1 – Gene i.d. according to ‘The Arabidopsis Information Resource’ (TAIR) database.

\*2 – Arabidopsis protein subcellular location database, SUBA (<https://suba.live/>); Clp – chloroplast/plastid, Cyt – cytosol, Mit – mitochondria, Nuc – nucleus, POs – peroxisome.

\*3 – This study.

## Supplementary Figure legends

**Figure S1.** The RNA helicase RH33 affects the processing of various protein-encoding transcripts in Arabidopsis mitochondria.

(A) Scheme of the RNA Helicase 33 (RH33), encoded by the At2g07750 gene locus. Black boxes represent exons, lines indicate to intron regions, while grey boxes show the 5' and 3' UTRs. The different T-DNA insertions are indicated above the gene structure as triangles.

(B) Growth and developmental phenotypes associated with the *rh33* mutants. Seeds of wild type (Col-0) and the three T-DNA insertional lines, *rh33-1* (Sail\_604\_A01), *rh33-2* (Salk\_119034), and *rh33-3* (Salk\_119725), were germinated on MS-agar plates supplemented with 1% sucrose. The picture shows 3-week-old seedlings grown under optimal growth conditions (i.e., short-day conditions, 10:14 light to dark, with a light intensity of  $\sim 150 \mu\text{E} \cdot \text{m}^{-2} \cdot \text{s}^{-1}$ , with 50% relative humidity (RH), under either 22°C (optimal condition) or 28°C (restrictive condition).

(C) Transcript abundance in *rh33* mutants. Real-time quantitative reverse transcription polymerase chain reaction (RT-qPCR) analyses of mitochondrial genes. Total RNA was extracted from 3-week-old seedlings of Col-0 and mutant plants were reverse-transcribed, and the relative steady-state levels of cDNAs corresponding to the different organellar transcripts were evaluated by qPCR with primers that specifically amplified mtRNAs. Specific oligonucleotides used in the RT-qPCRs are indicated in Ref's [1, 2].

**Figure S2.** Analysis of the splicing efficiencies of mitochondrial group II-type introns in *rh33-1* mutant.

The splicing efficiencies of the 23 group-II introns in Arabidopsis wild type (Col-0) and *rh33-1* mutant plants were evaluated by RT-qPCR, with RNA extracted from 3-week-old wild-type (Col-0) and *rh33-1* mutant plants. The splicing efficiencies were estimated from the relative accumulation (pre-RNA/mRNA ratio's) of organellar transcripts in the mutant line versus the wild type plants by RT-qPCR with specific oligonucleotides designed to intron-exon regions (pre-RNAs) and exon-exon (mRNAs). Specific oligonucleotides used in the RT-qPCRs are indicated in Ref's [1, 2].

## References

1. Best, C.; Mizrahi, R.; Edris, R.; Tang, H.; Zer, H.; Colas des Francs-Small, C.; Finkel, O. M.; Zhu, H.; Small, I. D.; Ostersetzer-Biran, O., MSP1 encodes an essential RNA-binding pentatricopeptide repeat factor required for nad1 maturation and complex I biogenesis in Arabidopsis mitochondria. *New Phytol* **2023**, 238, (6), 2375-2392.
2. Shevtsov-Tal, S.; Best, C.; Matan, R.; Chandran, S. A.; Brown, G. G.; Ostersetzer-Biran, O., nMAT3 is an essential maturase splicing factor required for holo-complex I biogenesis and embryo development in *Arabidopsis thaliana* plants. *Plant J* **2021**, 106, (4), 1128-1147.

# **A** At2g07750 (*RH33*) gene and T-DNA insertions

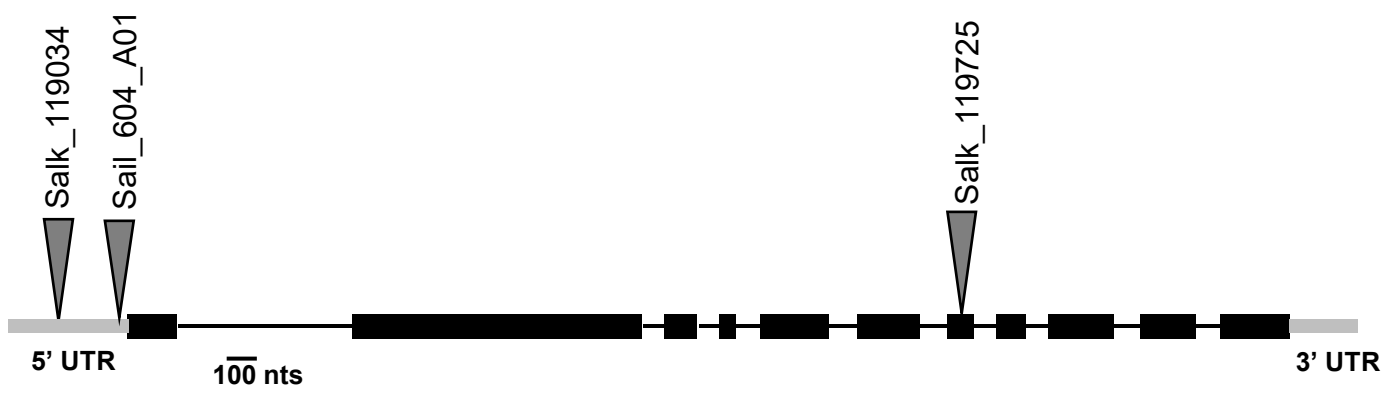

# **B**

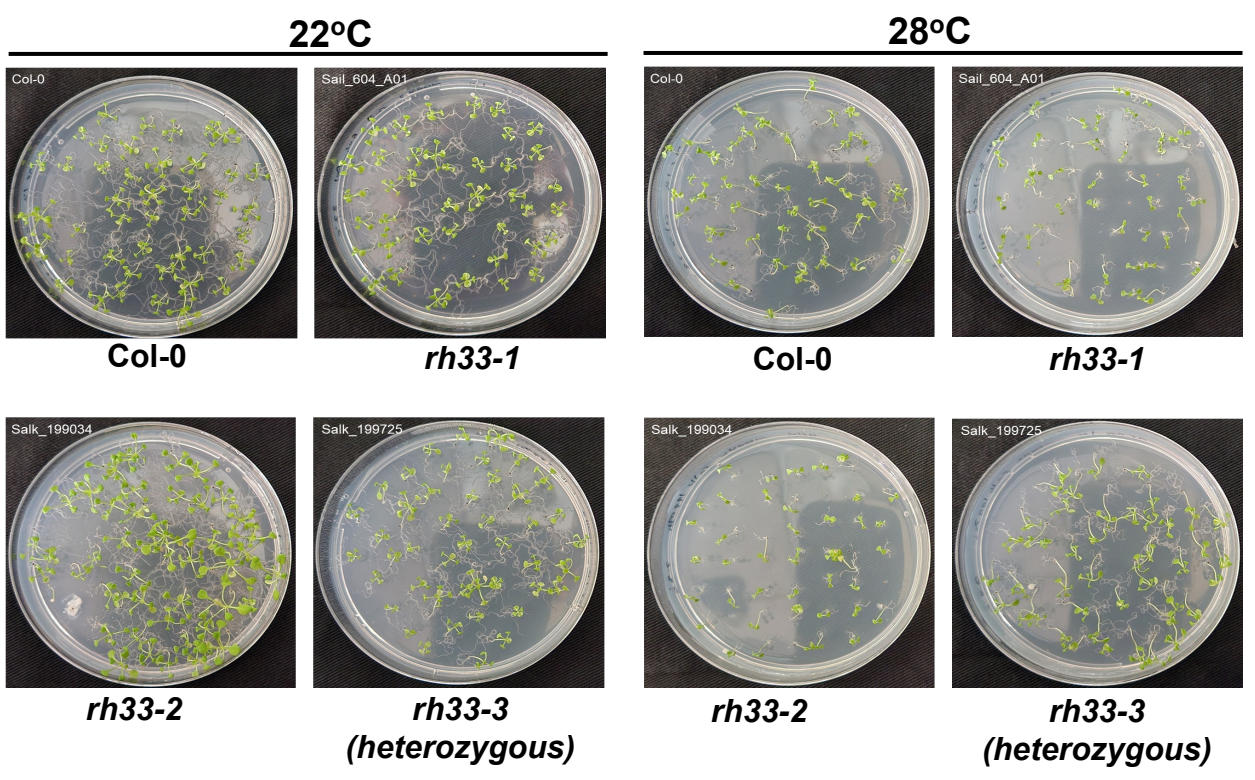

# **C**

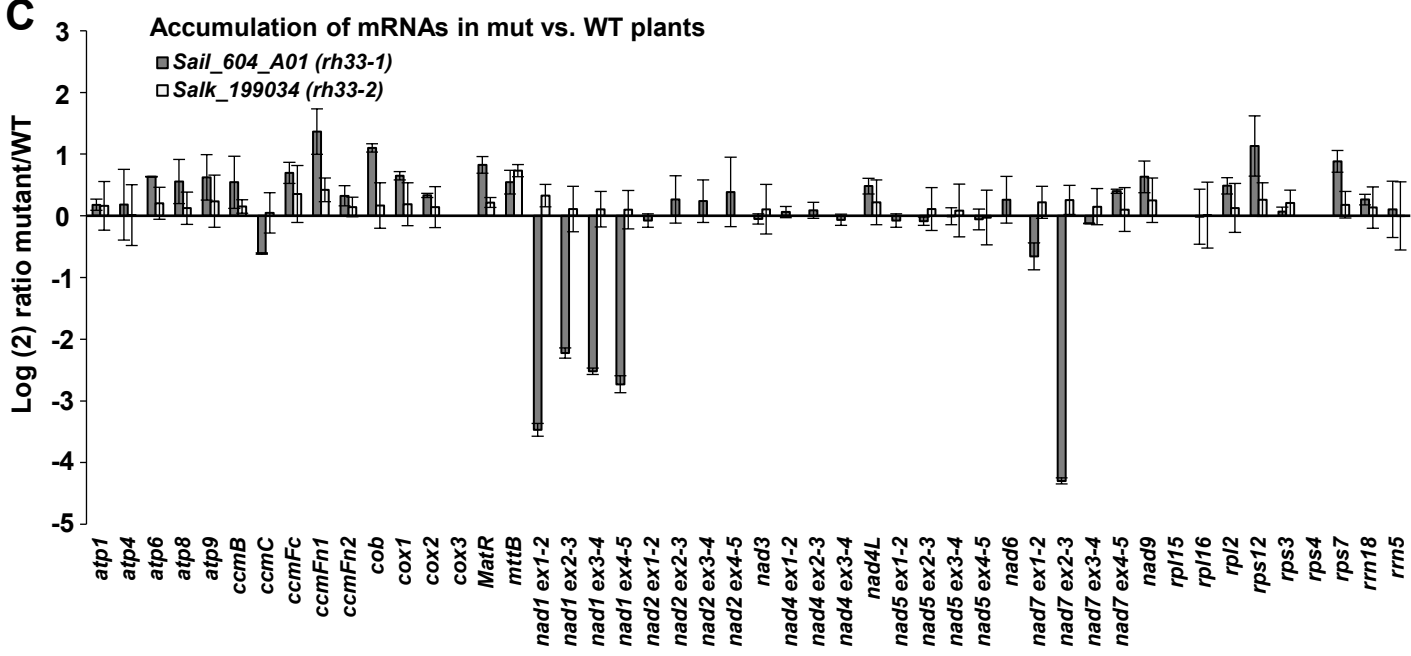

**Supplementary Fig. S1.** The RNA helicase RH33 affects the processing of various protein-encoding transcripts in Arabidopsis mitochondria.

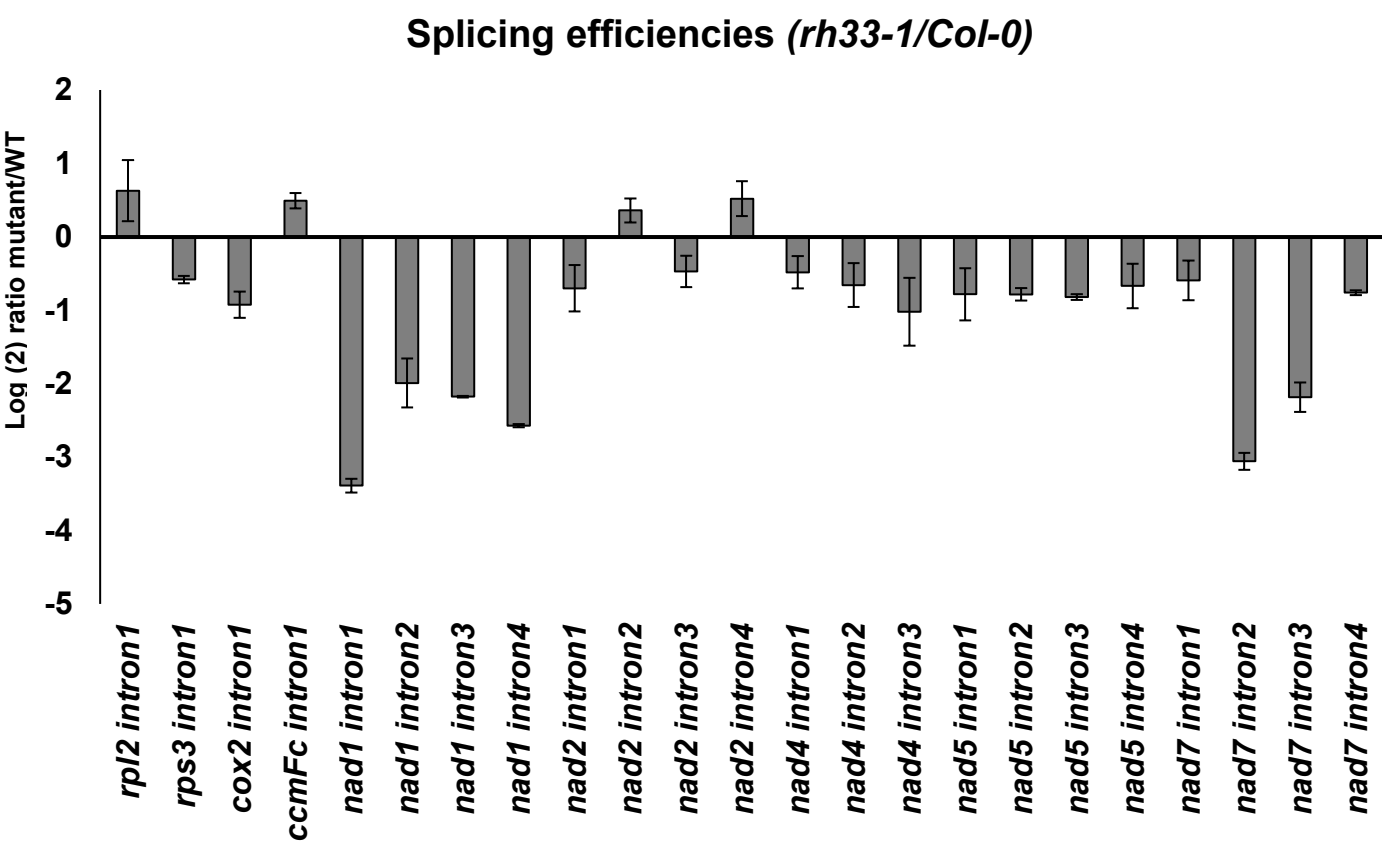

**Supplementary Fig. S2.** Analysis of the splicing efficiencies of mitochondrial group II-type introns in *rh33-1* mutant.
